# Supplementary material for: Panchromatic light harvesting in single wall carbon nanotube hybrids—immobilization of porphyrin–phthalocyanine conjugates
Source: Royal Society of Chemistry journal article supplement (doi:10.1039/c0cc05576j), 2011-01-01
Supplement: c0cc05576j.doc [file c0cc05576j.doc]

**Supporting Information**

Panchromatic light harvesting in single wall carbon nanotube hybrids – immobilization of porphyrin-phthalocyanine conjugates

Juergen Bartelmess**a**, Ana R. M. Soares**b,c**, M. Victoria Martínez-Díaz **c**, Maria G. P. M. S. Neves**b**, Augusto C. Tomé**b**, José A. S. Cavaleiro**b**, Tomás Torres **c,d,*** and Dirk M. Guldi**a,**

**Experimental section – Spectroscopic measurements**

THF was of spectrophotometric grade (99.5%), DMF was of ACS spectrophotometric grade (99.8%), all were purchased from Sigma-Aldrich. SWNT (HiPCO Batch Nr.: R0510C) were purchased from CNI. The experiments were performed at room temperature and ambient conditions. Steady-state absorption spectra were measured by a Cary5000 (Varian) two beam spectrometer. Emission spectra were recorded by using a FluoroMax-P (HORIBA). Femtosecond transient absorption studies were performed using 387 nm laser pulses with a 150 fs pulse width (1 kHz, 200 nJ), from an amplified Ti:sapphire laser system (SHG, CPA 2001, Clark-MXR Inc.) additional excitation experiments was carried by using 700 nm pulses created by a NOPA (Clark-MXR Inc.). For the detection we used a Helios TAPPS from Ultrafast Inc..


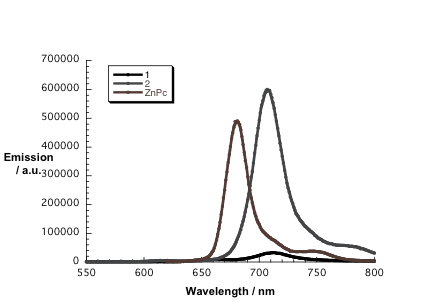


Figure S1: Fluorescence spectra of **1** (black), **2** (grey) upon photoexcitation at the porphyrin Soret band maximum (410 nm – **1**; 415 nm **2**) and of ZnPc (brown) after excitation at 610 nm. All samples 1.7 x 10-6 M in a mixture of 25% THF / 75% DMF.


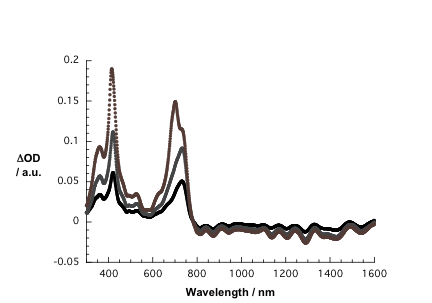


Figure S2: Differential absorption spectra calculated from titration experiments of SWNT suspended in a mixture of 25% THF / 75% DMF with **1**. Please compare Figure 1.


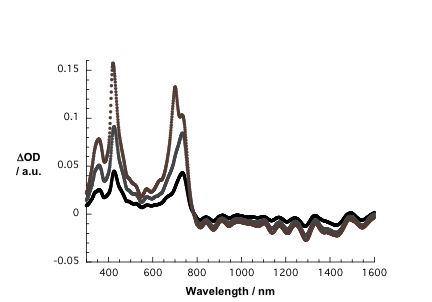


Figure S3: Differential absorption spectra calculated from titration experiments of SWNT suspended in a mixture of 25% THF / 75% DMF with **2**. Please compare Figure 2.


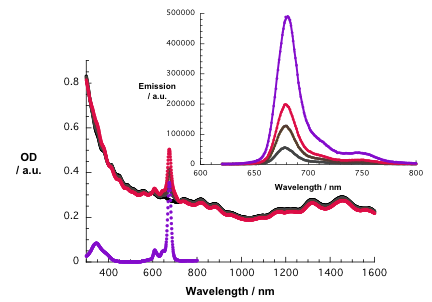


Figure S4: Titration of SWNT suspended in 25% THF / 75% DMF with ZnPc reference. Black – absorption spectrum of pure SWNT, grey – absorption spectrum of 5.8 x 10-7 M of ZnPcwith SWNT, brown – absorption spectrum of 1.1 x 10-6 M of ZnPc with SWNT, red – absorption spectrum of 1.7 x 10-6 M of ZnPc with SWNT, purple – absorption spectrum 1.7 x 10-6 of ZnPc. Inset: corresponding fluorescence spectra after 610 nm excitation.


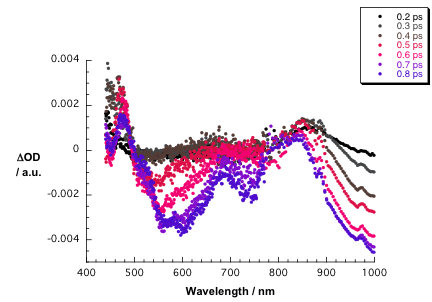


Figure 5 Differential absorption spectra obtained upon femtosecond laser flash photolysis (387 nm) of SWNT / **1** in 25% THF / 75% DMF at room temperature – visible and near-infrared part with time delays between 0.2 and 0.8 ps.
